# Supplementary material for: Protein expression of prenyltransferase subunits in postmortem schizophrenia dorsolateral prefrontal cortex
Source: PubMed Central journal article supplement (PMC7026430; doi:10.1038/s41398-019-0610-7), 2020-01-10

Supplementary Figure S1

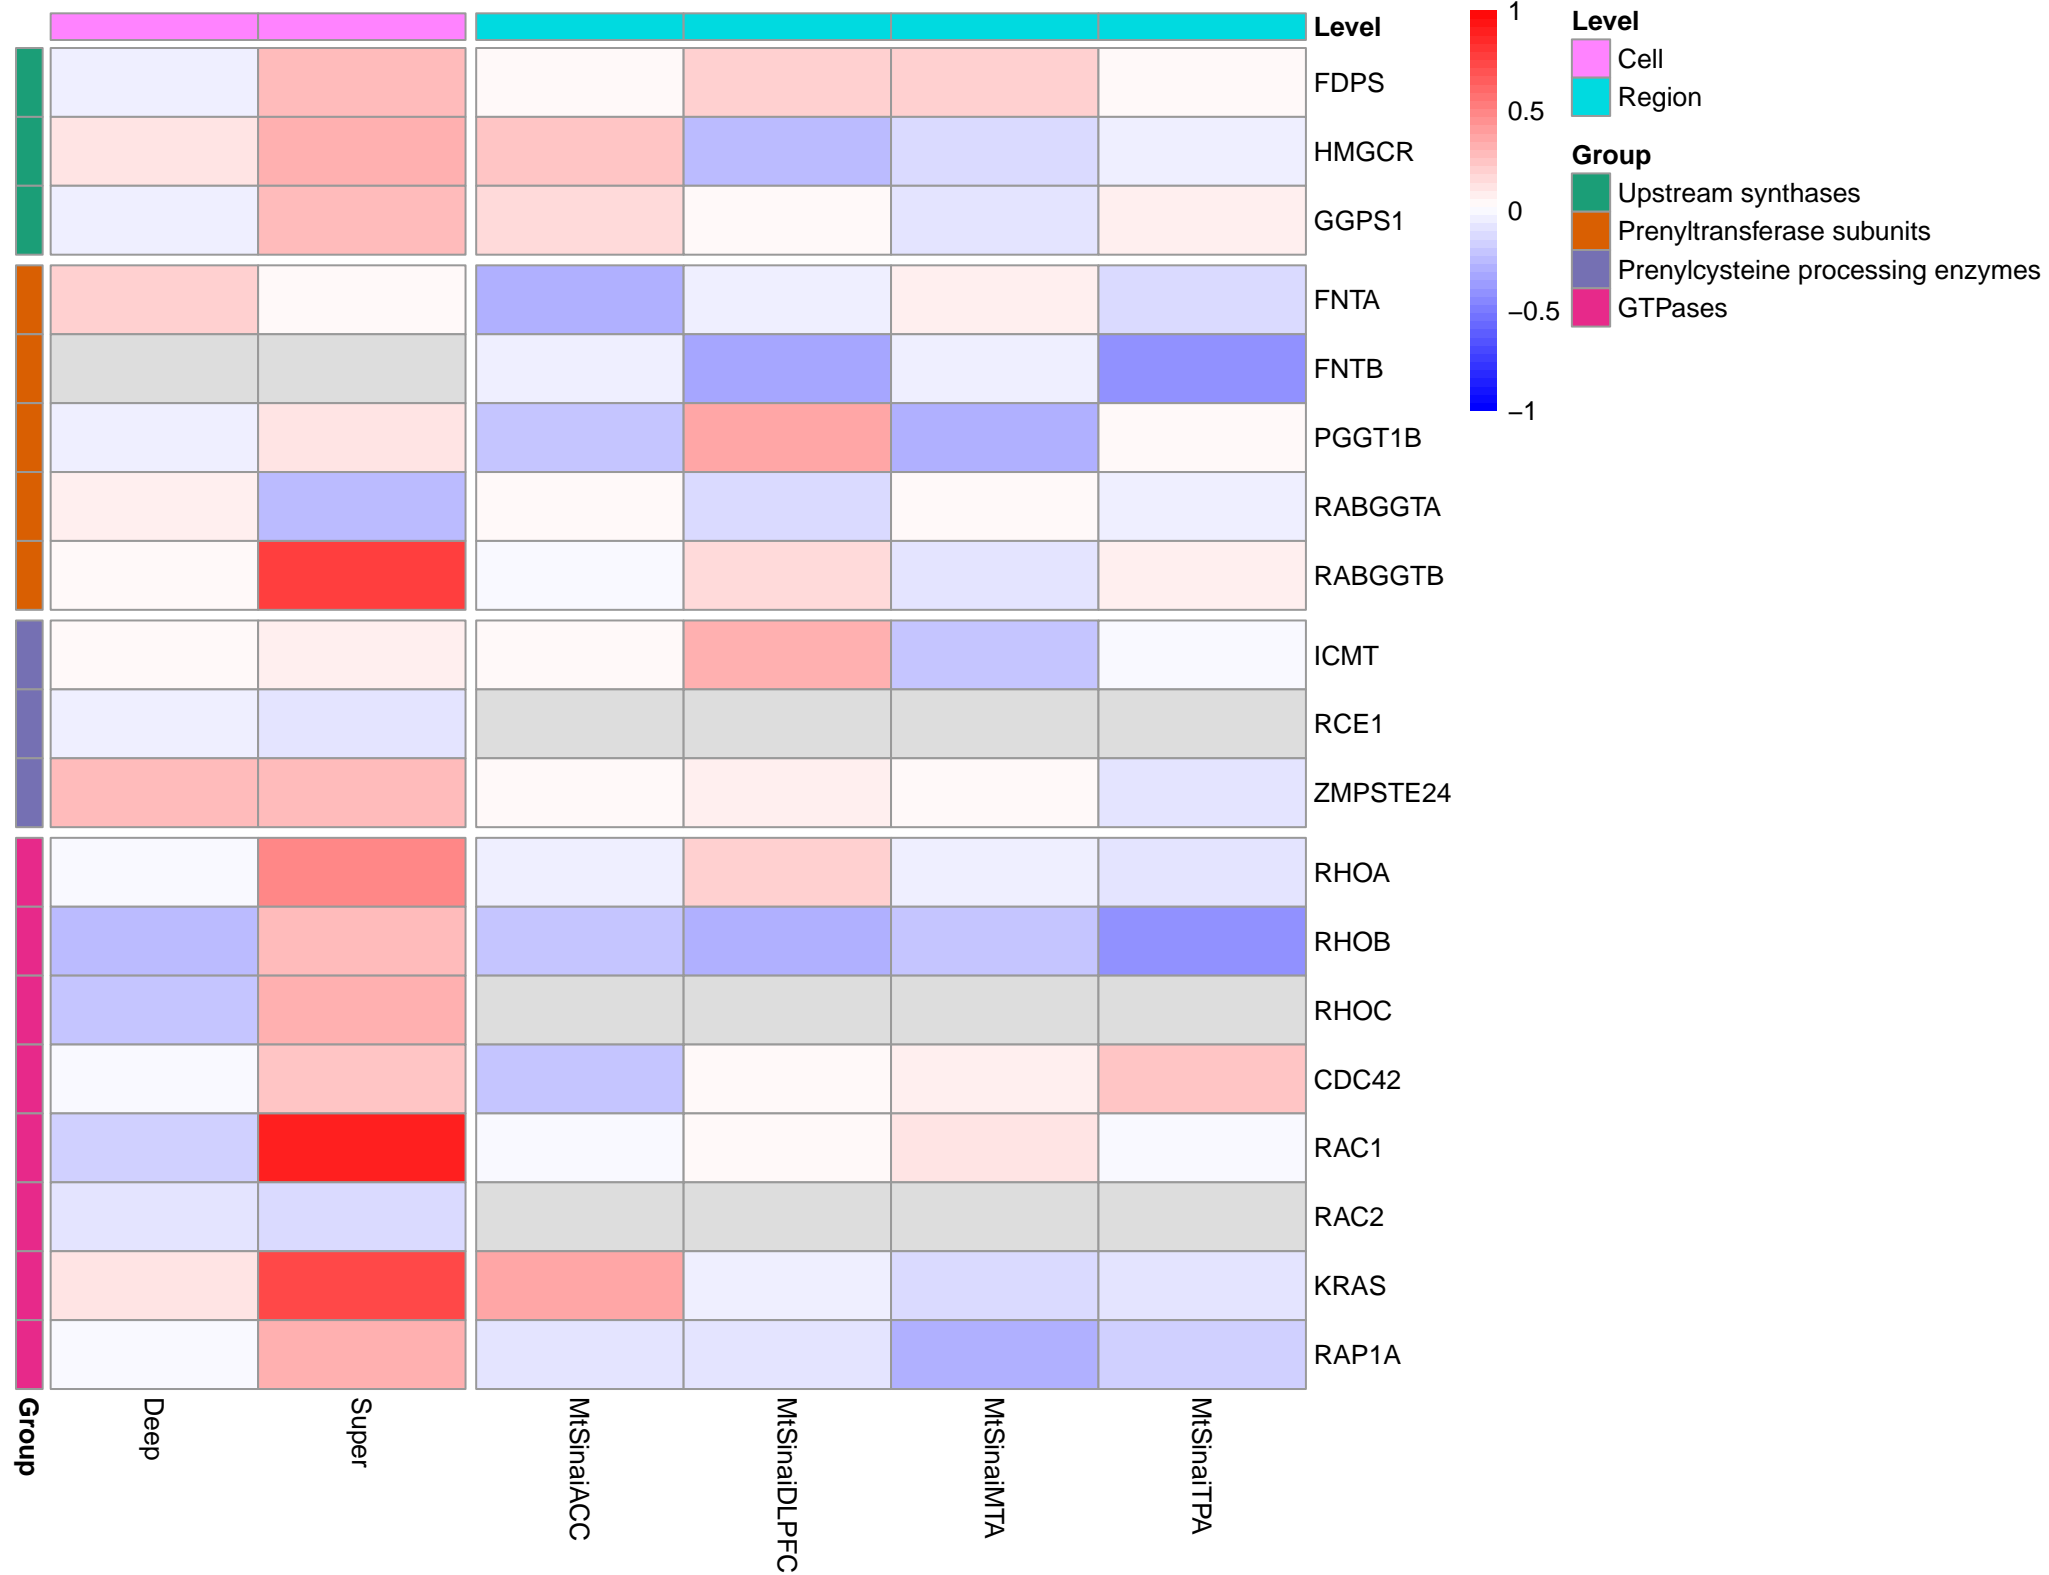

Supplement: 41398_2019_610_MOESM2_ESM.pdf [file 41398_2019_610_MOESM2_ESM.pdf]
