# Supplementary material for: Protein expression of prenyltransferase subunits in postmortem schizophrenia dorsolateral prefrontal cortex
Source: PubMed Central journal article supplement (PMC7026430; doi:10.1038/s41398-019-0610-7), 2020-01-10
Supplement: 41398_2019_610_MOESM3_ESM.pdf [file 41398_2019_610_MOESM3_ESM.pdf]

Supplementary Table S1. Expression differences of prenylation-associated genes from transcriptomic datasets

|                                   |             | MtSinaiMTA   |              |             | MtSinaiTPA   |              |              | MtSinaiACC   |              |             | MtSinaiDLPFC |              |         | DLPFC_Super  |              |             | DLPFC_Deep   |              |             |
|-----------------------------------|-------------|--------------|--------------|-------------|--------------|--------------|--------------|--------------|--------------|-------------|--------------|--------------|---------|--------------|--------------|-------------|--------------|--------------|-------------|
|                                   | Gene Symbol | FC           | LogFC        | p-value     | FC           | LogFC        | p-value      | FC           | LogFC        | p-value     | FC           | LogFC        | p-value | FC           | LogFC        | p-value     | FC           | LogFC        | p-value     |
| Upstream synthases                | FDPS        | <b>1.15</b>  | <b>0.20</b>  | 0.05        | 1.02         | 0.02         | 0.81         | 1.04         | 0.06         | 0.62        | <b>1.16</b>  | <b>0.21</b>  | 0.28    | <b>1.22</b>  | <b>0.28</b>  | 0.19        | -1.02        | -0.03        | 0.74        |
|                                   | HMGCR       | <b>-1.10</b> | <b>-0.14</b> | 0.34        | -1.04        | -0.05        | 0.81         | <b>1.19</b>  | <b>0.26</b>  | 0.23        | <b>-1.18</b> | <b>-0.24</b> | 0.15    | <b>1.24</b>  | <b>0.31</b>  | 0.22        | 1.09         | <b>0.13</b>  | 0.45        |
|                                   | GGPS1       | -1.06        | -0.09        | 0.54        | 1.06         | 0.09         | 0.44         | <b>1.14</b>  | <b>0.18</b>  | 0.13        | 1.03         | 0.05         | 0.66    | <b>1.21</b>  | <b>0.28</b>  | 0.19        | -1.04        | -0.05        | 0.60        |
| Prenyltransferase subunits        | FNTA        | 1.06         | 0.08         | 0.67        | -1.08        | -0.11        | 0.25         | <b>-1.21</b> | <b>-0.27</b> | 0.07        | -1.01        | -0.02        | 0.90    | 1.04         | 0.05         | 0.74        | <b>1.17</b>  | <b>0.22</b>  | 0.06        |
|                                   | FNTB        | -1.03        | -0.04        | 0.87        | <b>-1.34</b> | <b>-0.42</b> | <b>0.004</b> | -1.03        | -0.05        | 0.77        | <b>-1.25</b> | <b>-0.32</b> | 0.08    |              |              |             |              |              |             |
|                                   | PGGT1B      | <b>-1.21</b> | <b>-0.28</b> | 0.09        | 1.03         | 0.04         | 0.79         | <b>-1.15</b> | <b>-0.20</b> | 0.33        | <b>1.31</b>  | <b>0.39</b>  | 0.21    | <b>1.10</b>  | <b>0.14</b>  | 0.49        | -1.04        | -0.06        | 0.55        |
|                                   | RABGGTA     | 1.03         | 0.04         | 0.73        | -1.03        | -0.05        | 0.71         | 1.02         | 0.02         | 0.88        | <b>-1.10</b> | <b>-0.14</b> | 0.19    | <b>-1.17</b> | <b>-0.23</b> | 0.05        | 1.05         | 0.07         | 0.47        |
|                                   | RABGGTB     | -1.06        | -0.09        | 0.50        | 1.05         | 0.06         | 0.57         | -1.00        | -0.01        | 0.96        | <b>1.11</b>  | <b>0.15</b>  | 0.39    | <b>1.71</b>  | <b>0.78</b>  | 0.08        | 1.02         | 0.03         | 0.85        |
| Prenylcysteine processing enzymes | ICMT        | <b>-1.17</b> | <b>-0.22</b> | <b>0.01</b> | 1.01         | 0.01         | 0.94         | 1.04         | 0.06         | 0.69        | <b>1.25</b>  | <b>0.32</b>  | 0.41    | 1.06         | 0.09         | 0.42        | 1.02         | 0.03         | 0.74        |
|                                   | RCE1        |              |              |             |              |              |              |              |              |             |              |              | -1.05   | -0.07        | 0.52         | -1.02       | -0.02        | 0.80         |             |
|                                   | ZMPSTE24    | 1.03         | 0.04         | 0.65        | -1.06        | -0.09        | 0.16         | 1.04         | 0.06         | 0.58        | 1.07         | 0.09         | 0.35    | <b>1.20</b>  | <b>0.27</b>  | 0.17        | <b>1.20</b>  | <b>0.27</b>  | 0.09        |
| GTPases                           | RHOA        | -1.02        | -0.03        | 0.77        | -1.05        | -0.07        | 0.38         | -1.02        | -0.03        | 0.80        | <b>1.15</b>  | <b>0.20</b>  | 0.33    | <b>1.41</b>  | <b>0.49</b>  | <b>0.04</b> | -1.01        | -0.02        | 0.89        |
|                                   | RHOB        | <b>-1.15</b> | <b>-0.21</b> | 0.15        | <b>-1.33</b> | <b>-0.41</b> | <b>0.002</b> | <b>-1.14</b> | <b>-0.19</b> | 0.18        | <b>-1.21</b> | <b>-0.28</b> | 0.10    | <b>1.22</b>  | <b>0.29</b>  | <b>0.02</b> | <b>-1.18</b> | <b>-0.23</b> | <b>0.01</b> |
|                                   | RHOC        |              |              |             |              |              |              |              |              |             |              |              |         | <b>1.24</b>  | <b>0.31</b>  | <b>0.03</b> | <b>-1.15</b> | <b>-0.21</b> | 0.08        |
|                                   | CDC42       | 1.05         | 0.06         | 0.69        | <b>1.18</b>  | <b>0.23</b>  | <b>0.03</b>  | <b>-1.16</b> | <b>-0.22</b> | 0.29        | 1.03         | 0.04         | 0.76    | <b>1.19</b>  | <b>0.25</b>  | 0.29        | 1.01         | 0.01         | 0.92        |
|                                   | RAC1        | <b>1.10</b>  | <b>0.13</b>  | 0.07        | 1.00         | 0.00         | 0.95         | 1.01         | 0.02         | 0.82        | 1.02         | 0.03         | 0.66    | <b>1.84</b>  | <b>0.88</b>  | 0.06        | <b>-1.11</b> | <b>-0.15</b> | 0.32        |
|                                   | RAC2        |              |              |             |              |              |              |              |              |             |              |              |         | <b>-1.10</b> | <b>-0.13</b> | 0.21        | -1.06        | -0.09        | 0.51        |
|                                   | KRAS        | <b>-1.10</b> | <b>-0.14</b> | 0.25        | -1.05        | -0.07        | 0.58         | <b>1.31</b>  | <b>0.38</b>  | <b>0.01</b> | -1.04        | -0.05        | 0.61    | <b>1.65</b>  | <b>0.73</b>  | <b>0.01</b> | 1.09         | <b>0.13</b>  | 0.38        |
|                                   | RAP1A       | <b>-1.22</b> | <b>-0.29</b> | 0.06        | <b>-1.13</b> | <b>-0.18</b> | 0.16         | -1.04        | -0.06        | 0.73        | -1.04        | -0.06        | 0.75    | <b>1.24</b>  | <b>0.32</b>  | 0.16        | 1.01         | 0.01         | 0.91        |

Values in bold type indicate fold change (FC)  $\geq \pm 1.10$  or  $p < 0.05$
